# Supplementary material for: Hemoptysis complicating ultrasound-guided transthoracic needle lung biopsy: air bronchial sign is a risk predictor
Source: PubMed Central journal article supplement — J Thorac Dis. 2020 Jun;12(6):3167–77. doi: 10.21037/jtd-20-1247 (PMC7330789; doi:10.21037/jtd-20-1247), 2020-06
Supplement: jtd-12-06-3167-dss.pdf [file jtd-12-06-3167-dss.pdf]

## Data Sharing Statement

|                               |                                                                                             |                                                                                                                                                         |
|-------------------------------|---------------------------------------------------------------------------------------------|---------------------------------------------------------------------------------------------------------------------------------------------------------|
| <b>Article information</b>    | <a href="http://dx.doi.org/10.21037/jtd-20-1247">http://dx.doi.org/10.21037/jtd-20-1247</a> |                                                                                                                                                         |
| <b>Section</b>                | <b>Question</b>                                                                             | <b>Authors' Response<br/>(place "-" if not applicable)</b>                                                                                              |
| Data collected for your study | Will the data collected for your study be made available to others?                         | Yes                                                                                                                                                     |
|                               | If not, would you like to share the reason for your decision?                               | -                                                                                                                                                       |
|                               | What data in particular will be shared?                                                     | Individual participant data that underlie the results reported in this article, after de-identification (text, tables, and figures).                    |
|                               | Any additional information about data?                                                      | -                                                                                                                                                       |
|                               | How or where can the data be obtained?                                                      | Proposals should be directed to tqgyyy@126.com to gain access and data.                                                                                 |
|                               | When will data availability begin?                                                          | 3 months starting from the article publication.                                                                                                         |
|                               | When will data availability end?                                                            | 12 months after the article publication.                                                                                                                |
| Supporting documents          | Will any supporting documents be available?                                                 | -                                                                                                                                                       |
|                               | Which supporting documents?                                                                 | -                                                                                                                                                       |
|                               | Any additional information about supporting documents?                                      | -                                                                                                                                                       |
|                               | How or where can supporting documents be obtained?                                          | -                                                                                                                                                       |
|                               | When will supporting documents availability begin?                                          | -                                                                                                                                                       |
|                               | When will supporting documents availability end?                                            | -                                                                                                                                                       |
| Restrictions                  | To whom will data be available?                                                             | Investigators whose proposed use of the data has been approved by an independent review committee ("learned intermediary") identified for this purpose. |

|                        |                                       |                                                                         |
|------------------------|---------------------------------------|-------------------------------------------------------------------------|
|                        | For what type of analysis or purpose? | To achieve aims in the approved proposal.                               |
|                        | By what mechanism?                    | Proposals should be directed to tqgyyy@126.com to gain access and data. |
|                        | Any other restrictions?               | -                                                                       |
| Additional information |                                       | -                                                                       |
